# Supplementary material for: Enhanced H2 production from dehydrogenation of sodium borohydride over the ternary Co0.97Pt0.03/CeOx nanocomposite grown on CGO catalytic support
Source: PubMed Central journal article supplement (PMC9119289; doi:10.1039/c9ra10742h), 2020-10-16
Supplement: RA-010-C9RA10742H-s001.pdf [file RA-010-C9RA10742H-s001.pdf]

## **Supplementary Information**

### **Enhanced H<sub>2</sub> production from Ethanolysis of Sodium borohydride over ternary Co<sub>0.97</sub>Pt<sub>0.03</sub>/CeO<sub>x</sub> nanocomposite grown on catalytic support CGO**

*Abhay Vijay Kotkondawar<sup>+</sup> and Sadhana Rayalu<sup>+\*</sup>*

<sup>+</sup>Environmental Materials Division, CSIR-National Environmental Engineering Research Institute, Nehru Marg, Nagpur-440020, Maharashtra (M.S.), India.

**\*Corresponding Author:** [s\\_rayalu@neeri.res.in](mailto:s_rayalu@neeri.res.in)

**KEYWORDS:** Ethanolysis; CGO; Sodium borohydride; Ammonia borane; hydrogen production; Activation Energy.

- Number of pages: 11
- Number of figures: 13
- Number of tables: 02

## Content:

- Figure.S1** FT- IR spectrum of carbon nanoparticles and CGO.
- Figure.S2** Raman spectrum of carbon nanoparticles (CNP), CGO and  $\text{Co}_{0.97}\text{Pt}_{0.03}/\text{CeO}_x/\text{CGO}$  nanohybrid.
- Figure.S3** The Energy dispersive X-ray (EDX) spectrum of  $\text{Co}_{0.97}\text{Pt}_{0.03}/\text{CeO}_x/\text{CGO}$ .
- Figure.S4** The High resolution O1s XPS spectrum of CGO.
- Figure.S5** XPS Survey spectrum of  $\text{Co}_{0.97}\text{Pt}_{0.03}/\text{CeO}_x/\text{CGO}$ .
- Figure.S6** Rate of  $\text{H}_2$  generation (HGR) ( $\text{L}/\text{g}_{(\text{M})}*\text{min}$ ) from ethanolysis of SB catalyzed by nanohybrid with support ( $\text{Co}_{0.97}\text{Pt}_{0.03}/\text{CeO}_x/\text{CGO}$ ;  $\text{Co}/\text{CeO}_x/\text{CGO}$ ;  $\text{Co}_{0.97}\text{Pt}_{0.03}/\text{CGO}$ ;  $\text{CeO}_x/\text{Pt}_{0.03}/\text{CGO}$ ;  $\text{Co}/\text{CGO}$ ) and without support ( $\text{Co}_{0.97}\text{Pt}_{0.03}/\text{CeO}_x$ ;  $\text{Co}/\text{CeO}_x$ ;  $\text{Co}_{0.97}\text{Pt}_{0.03}$ ;  $\text{CeO}_x/\text{Pt}_{0.03}$ ;  $\text{Co}$ )
- Figure.S7** Effect of catalytic support (S: CNP, GO and CGO) on rate of hydrogen production from alkaline ethanolysis of SB catalyzed by  $\text{Co}_{0.97}\text{Pt}_{0.03}/\text{CeO}_x/\text{S}$  nanohybrid.
- Figure.S8** Effect of solvotic medium on rate of hydrogen production from alkaline ethanolysis of SB catalyzed by  $\text{Co}_{0.97}\text{Pt}_{0.03}/\text{CeO}_x/\text{CGO}$  nanohybrid.
- Figure.S9** Plot of the volume of  $\text{H}_2$  generated versus time (min) for ethanolysis of SB (13.21 mM) catalyzed by  $\text{Co}_{0.97}\text{Pt}_{0.03}/\text{CeO}_x/\text{CGO}$  at 300 K for different concentration of NaOH.
- Figure.S10** Rate of  $\text{H}_2$  generation (HGR) ( $\text{L}/\text{g}_{(\text{M})}*\text{min}$ ) from ethanolysis of SB (13.21 mM) catalyzed by  $\text{Co}_{0.97}\text{Pt}_{0.03}/\text{CeO}_x/\text{CGO}$  at 300 K for different concentration of NaOH
- Figure.S11** Effect of Co-concentration on rate of hydrogen production from alkaline ethanolysis of SB catalyzed by  $\text{Co}_{0.97}\text{Pt}_{0.03}/\text{CeO}_x/\text{CGO}$  nanohybrid.
- Figure.S12** Effect of temperature on rate of hydrogen production from alkaline ethanolysis of SB catalyzed by  $\text{Co}_{0.97}\text{Pt}_{0.03}/\text{CeO}_x/\text{CGO}$  nanohybrid.
- Figure.S13** Reusability of  $\text{Co}_{0.97}\text{Pt}_{0.03}/\text{CeO}_x/\text{CGO}$  nanohybrid for alkaline ethanolysis of SB.

**Table.S1** Summary of deconvolution analysis of CGO.

**Table.S2** Summary of deconvolution analysis of  $\text{Co}_{0.97}\text{Pt}_{0.03}/\text{CeO}_x/\text{CGO}$ .

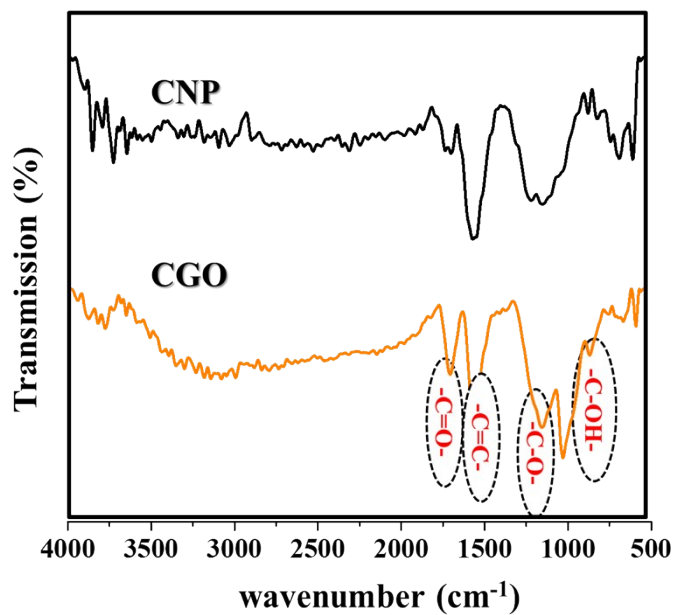

**Figure. S1.** FT-IR spectrum of carbon nanoparticles and CGO.

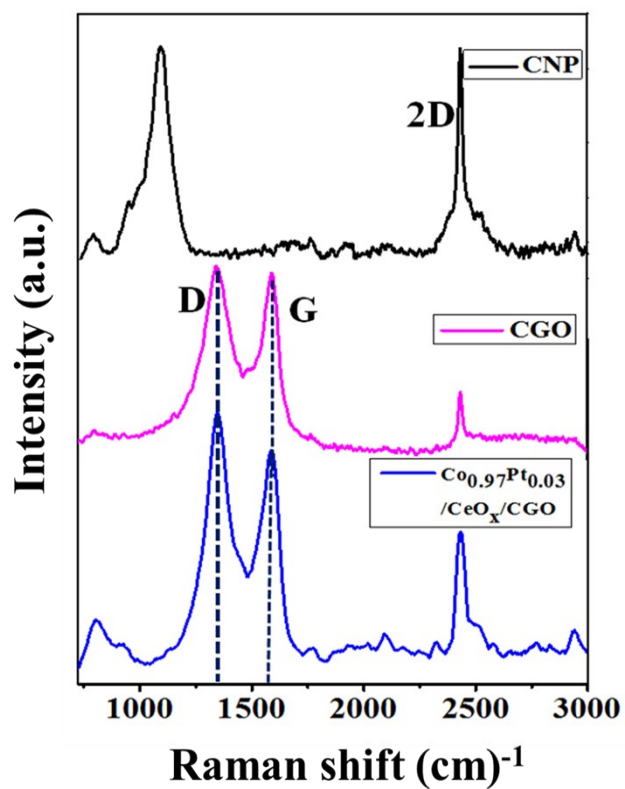

**Figure. S2.** Raman spectrum of carbon nanoparticles (CNP), CGO and  $\text{Co}_{0.97}\text{Pt}_{0.03}/\text{CeO}_x/\text{CGO}$  nanohybrid.

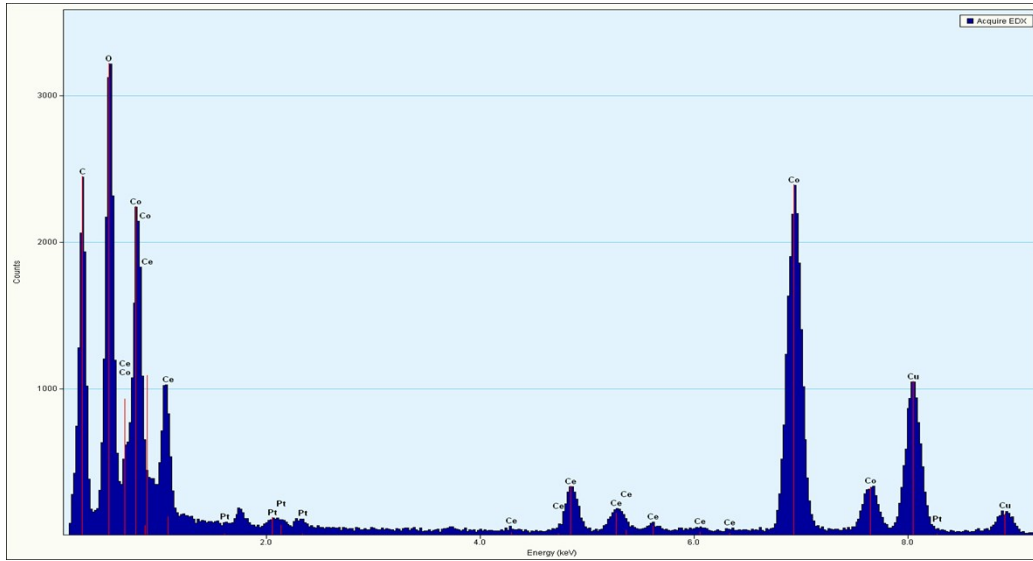

**Figure. S3.** The Energy dispersive X-ray (EDX) spectrum of  $\text{Co}_{0.97}\text{Pt}_{0.03}/\text{CeO}_x/\text{CGO}$ .

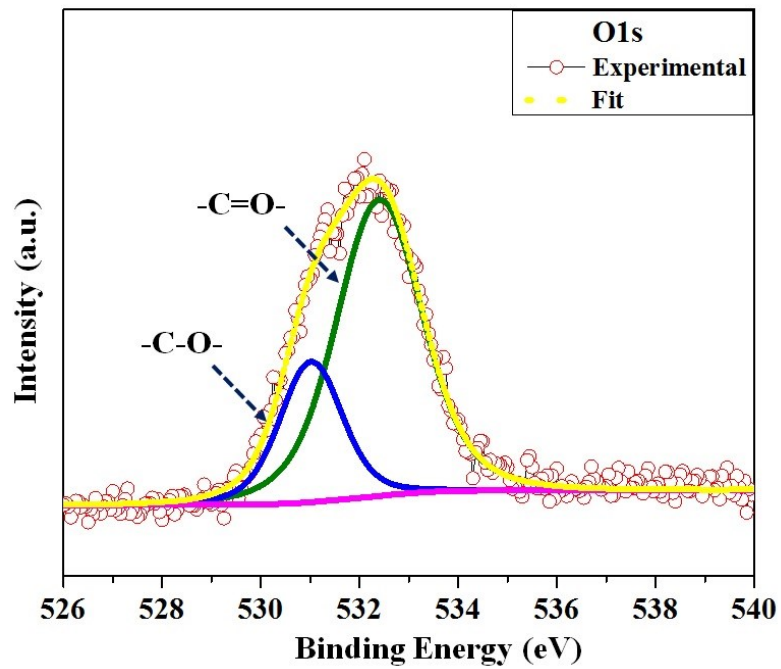

**Figure. S4.** The High resolution O1s XPS spectrum of CGO.

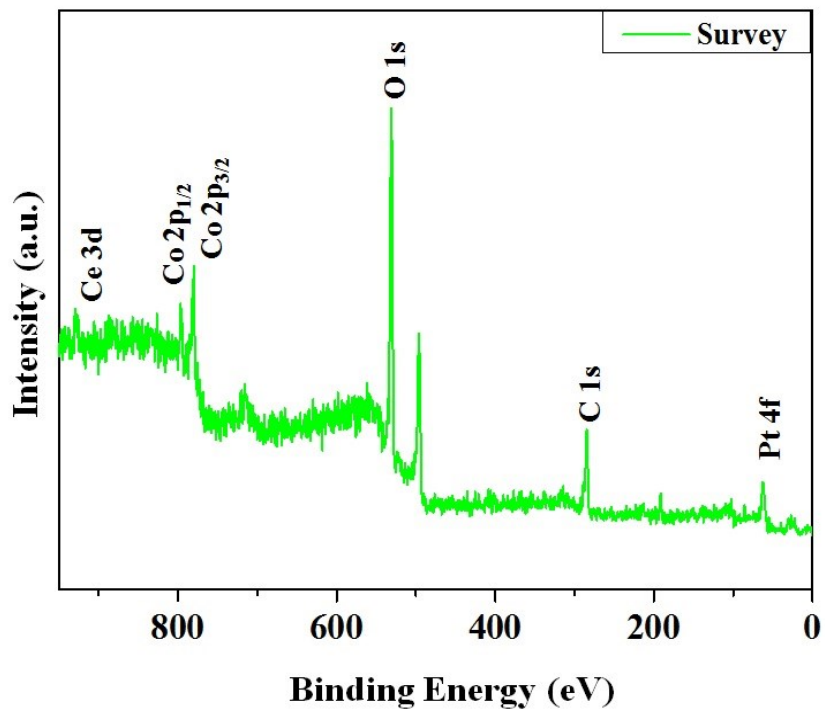

Figure. S5. XPS Survey spectrum of  $\text{Co}_{0.97}\text{Pt}_{0.03}/\text{CeOx}/\text{CGO}$ .

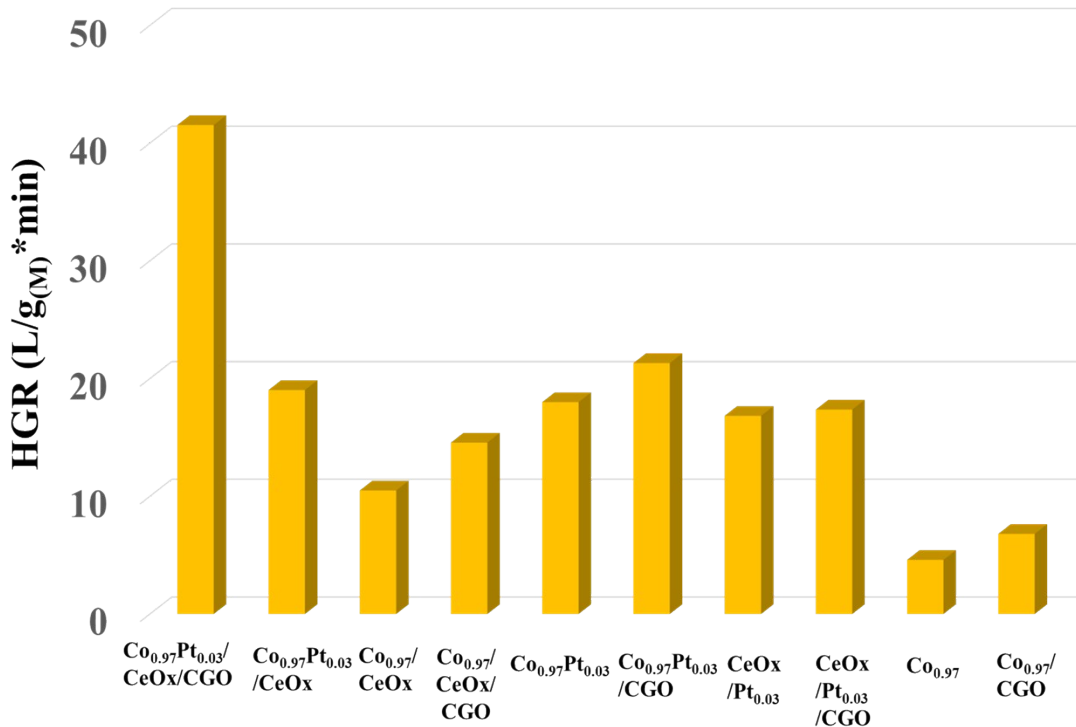

**Figure. S6.** Rate of H<sub>2</sub> generation (HGR) (L/g<sub>(M)</sub>\*min) from ethanolsis of SB catalyzed by nanohybrid with support (Co<sub>0.97</sub>Pt<sub>0.03</sub>/CeOx/CGO; Co/CeOx/CGO; Co<sub>0.97</sub>Pt<sub>0.03</sub>/CGO; CeOx/Pt<sub>0.03</sub>/CGO; Co/CGO) and without support (Co<sub>0.97</sub>Pt<sub>0.03</sub>/CeOx; Co/CeOx; Co<sub>0.97</sub>Pt<sub>0.03</sub>; CeOx/Pt<sub>0.03</sub>; Co).

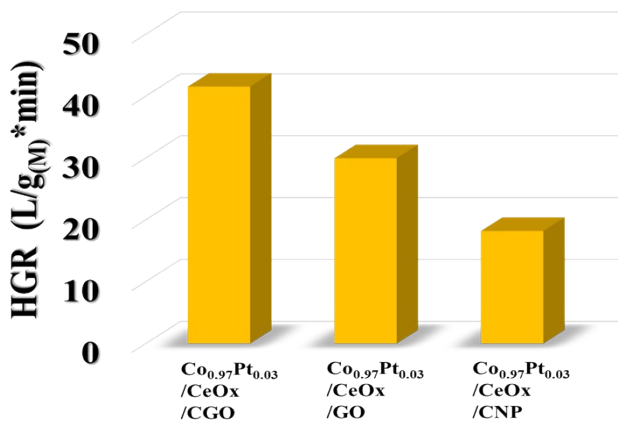

**Figure. S7.** Effect of catalytic support (S: CNP, GO and CGO) on rate of hydrogen production from alkaline ethanolsis of SB catalyzed by Co<sub>0.97</sub>Pt<sub>0.03</sub>/CeOx/S nanohybrid.

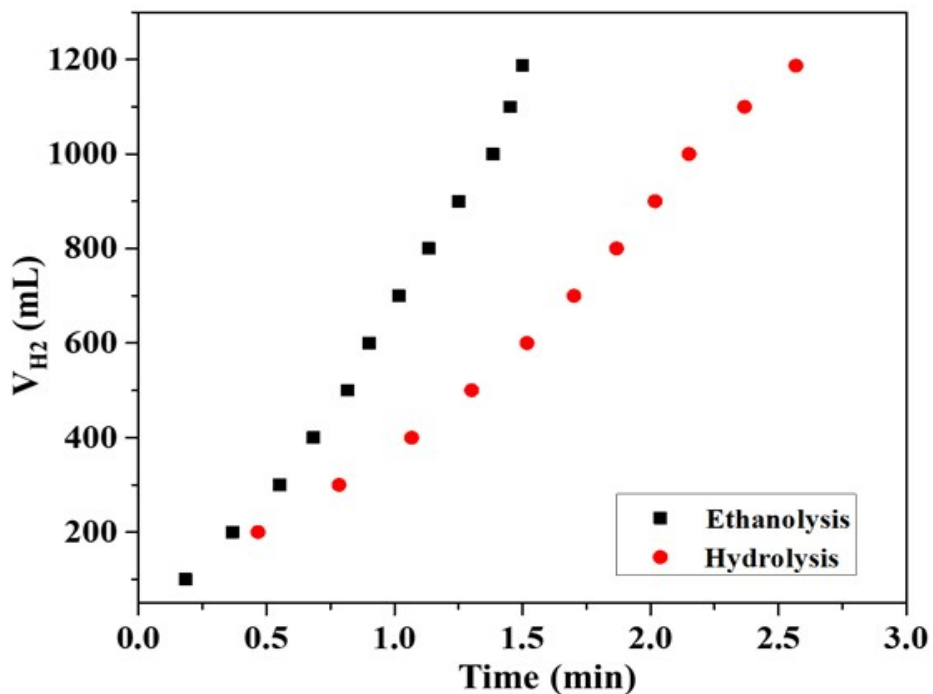

**Figure. S8.** Effect of solvotic medium on rate of hydrogen production from alkaline ethanolysis of SB catalyzed by  $\text{Co}_{0.97}\text{Pt}_{0.03}/\text{CeO}_x/\text{CGO}$  nanohybrid.

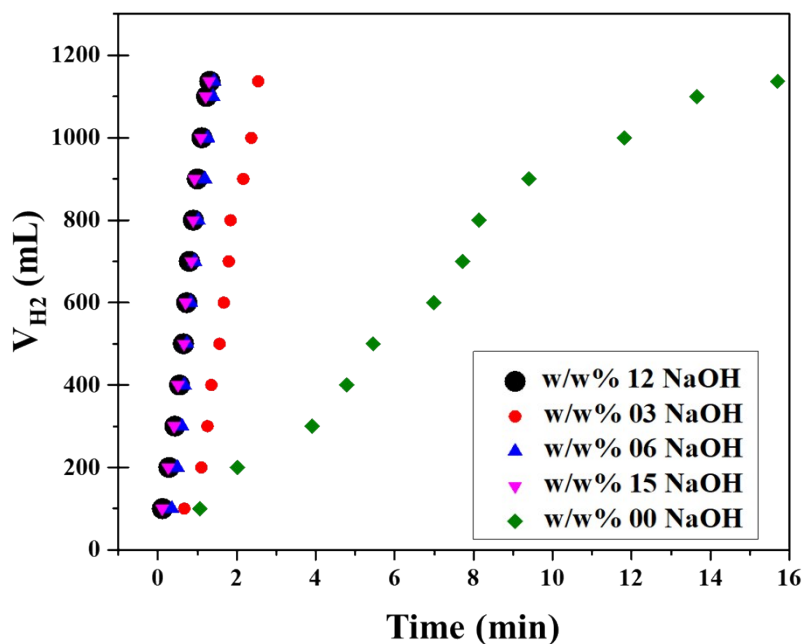

**Figure.S9.** Plot of the volume of  $\text{H}_2$  generated versus time (min) for ethanolysis of SB (13.21 mM) catalyzed by  $\text{Co}_{0.97}\text{Pt}_{0.03}/\text{CeO}_x/\text{CGO}$  at 300 K for different concentration of NaOH.



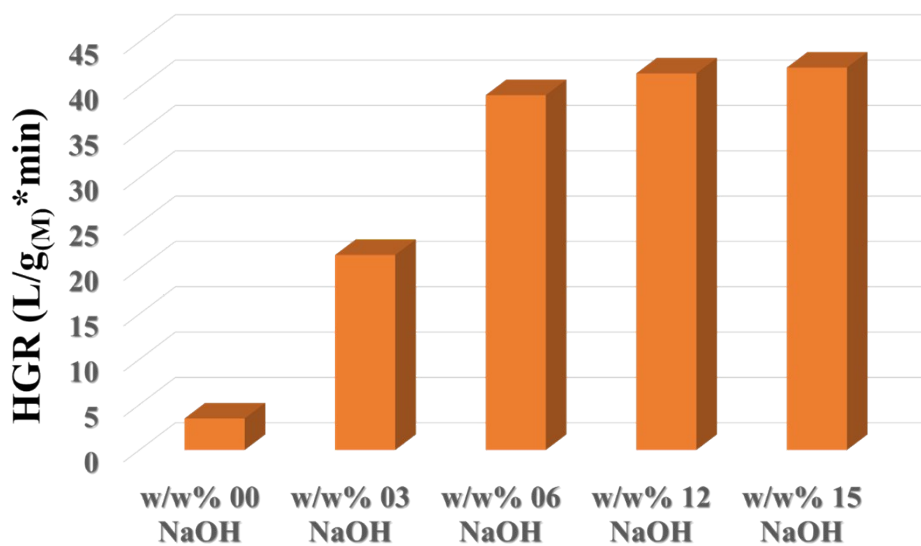

**Figure.S10.** Rate of H<sub>2</sub> generation (HGR) (L/g(M)\*min) from ethanolsis of SB (13.21 mM) catalyzed by Co<sub>0.97</sub>Pt<sub>0.03</sub>/CeO<sub>x</sub>/CGO at 300 K for different concentration of NaOH.

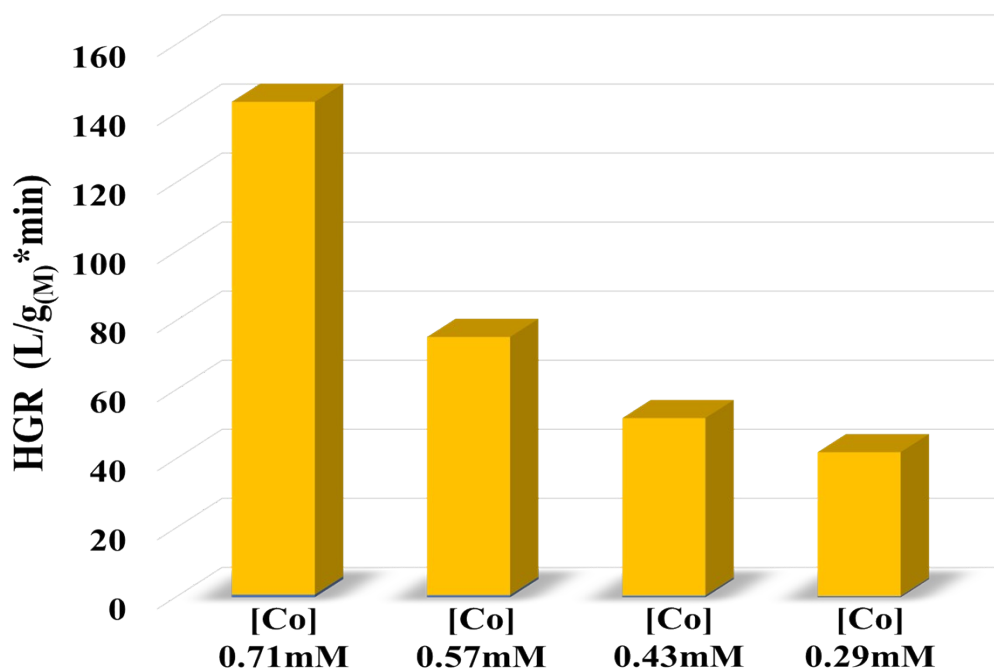

**Figure. S11.** Effect of Co-concentration on rate of hydrogen production from alkaline ethanolsis of SB catalyzed by Co<sub>0.97</sub>Pt<sub>0.03</sub>/CeO<sub>x</sub>/CGO nanohybrid.

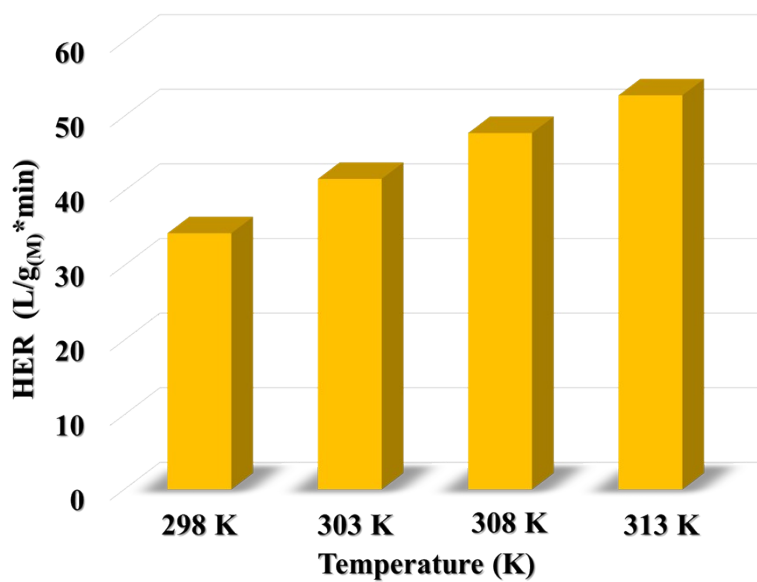

**Figure. S12.** Effect of temperature on rate of hydrogen production from alkaline ethanolysis of SB catalyzed by  $\text{Co}_{0.97}\text{Pt}_{0.03}/\text{CeO}_x/\text{CGO}$  nanohybrid.

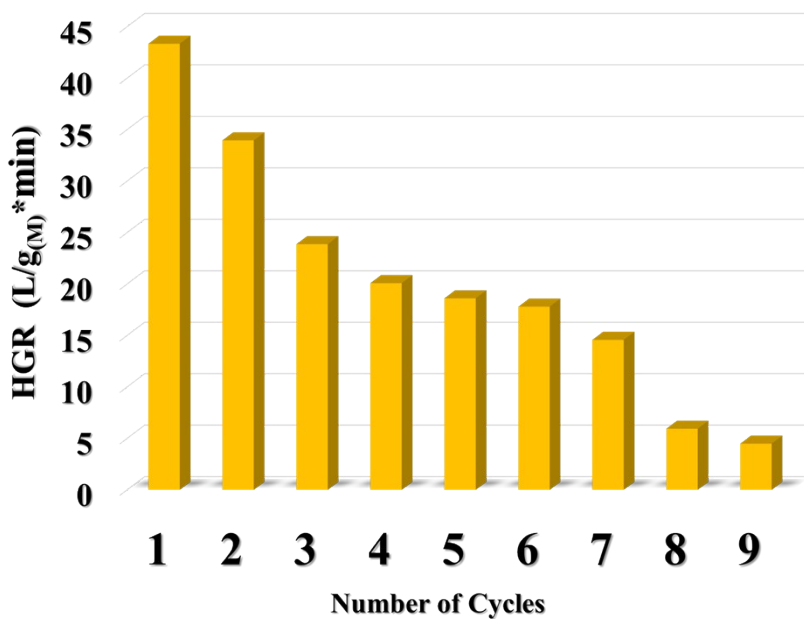

**Figure. S13.** Reusability of  $\text{Co}_{0.97}\text{Pt}_{0.03}/\text{CeO}_x/\text{CGO}$  nanohybrid for alkaline ethanolysis of SB.

**Table.S1:** Summary of deconvolution analysis of CGO.

| Catalyst | Functional Group | Binding Energy (eV) | % Total <sup>a</sup> |
|----------|------------------|---------------------|----------------------|
| CGO      | Csp2             | 283.96              | 55.9                 |
|          | Csp3             | 285.4               | 11.8                 |
|          | C-O              | 285.8               | 8.4                  |
|          | O-C-O            | 286.4               | 10.2                 |
|          | C=O              | 288.28              | 7.8                  |
|          | O-C=O            | 289.06              | 5.9                  |

a = % Total calculated by comparing peak area under the curve

**Table. S2:** Summary of deconvolution analysis of Co<sub>0.97</sub>Pt<sub>0.03</sub>/CeO<sub>x</sub>/CGO.

| Catalyst                    | Valance state | Binding energy (eV) | % Total <sup>a</sup> |
|-----------------------------|---------------|---------------------|----------------------|
| Co-Pt-CeO <sub>x</sub> /CGO | Co (0)        | 778.08              | 25.5                 |
|                             | Co (II)       | 780.13              | 27.1                 |
|                             | Co (III)      | 795.2               | 47.4                 |
|                             | Ce (III)      | 903.48 (u')         | 21                   |
|                             |               | 885.26 (v')         |                      |
|                             | Ce (IV)       | 901.39 (u)          | 79                   |
|                             |               | 907.09 (u'')        |                      |
|                             |               | 916.93 (u''')       |                      |
|                             |               | 882.84 (v)          |                      |
|                             |               | 888.11 (v'')        |                      |
|                             |               | 898.24 (v''')       |                      |
|                             | Pt (0)        | 71.72               | 80.3                 |
|                             |               | 74.97               |                      |
|                             | Pt (II)       | 72.42               | 19.7                 |
| 75.89                       |               |                     |                      |

a = % Total calculated by comparing peak area under the curve
